# Supplementary material
Source: PubMed Central journal article supplement (PMC7534928)

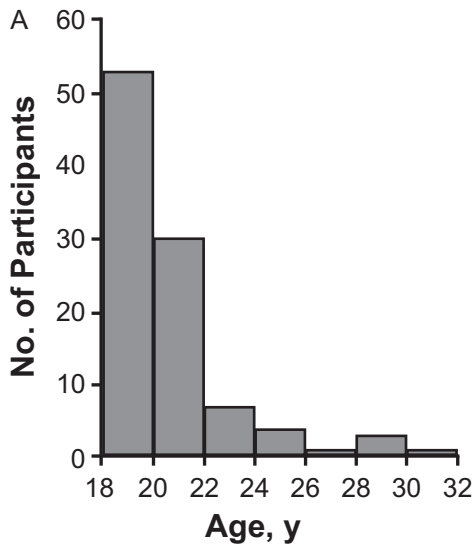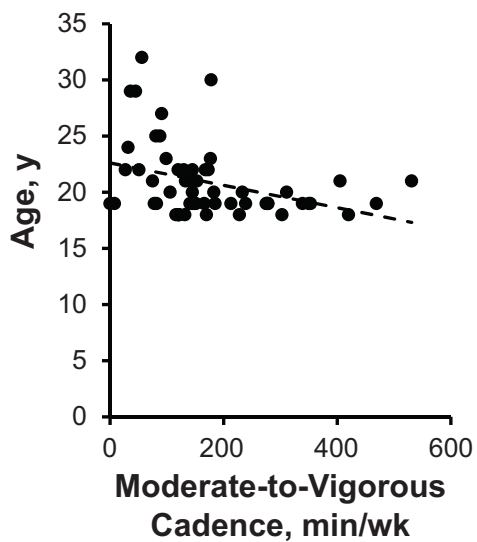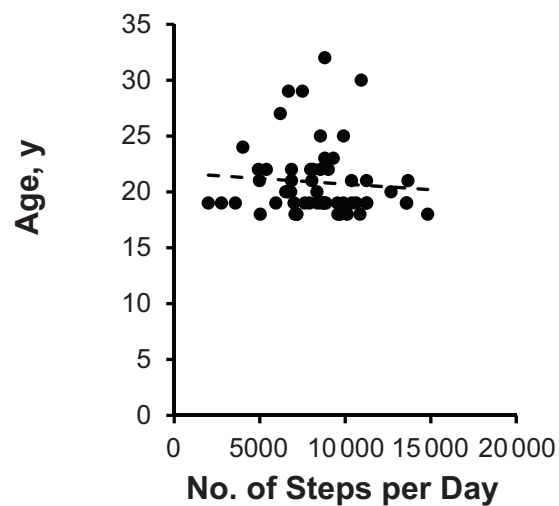

**B**

$\rho = -0.196$

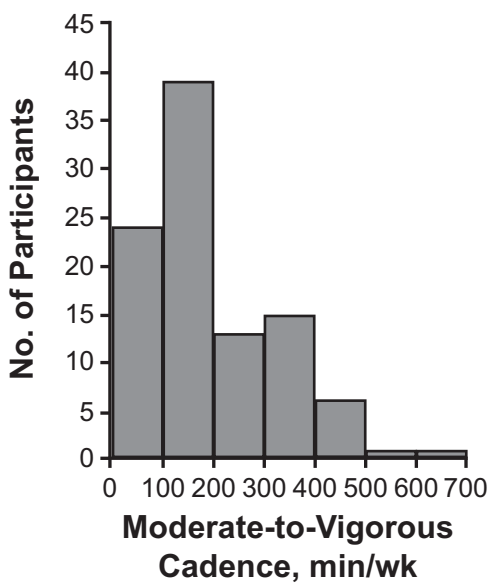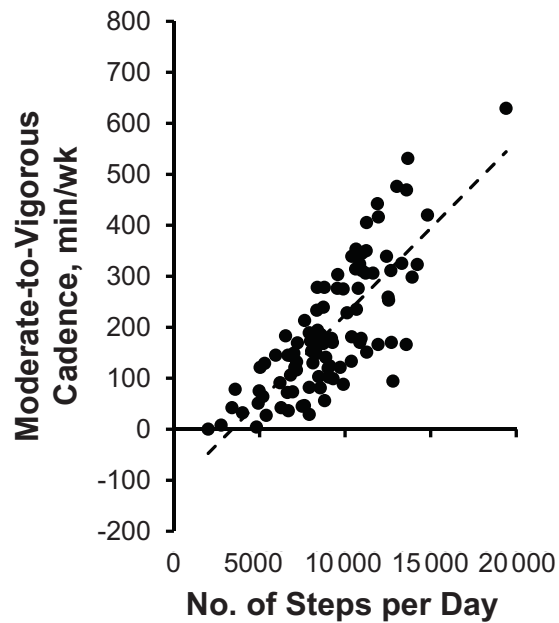

**C**

$\rho = -0.023$

$\rho = 0.759$

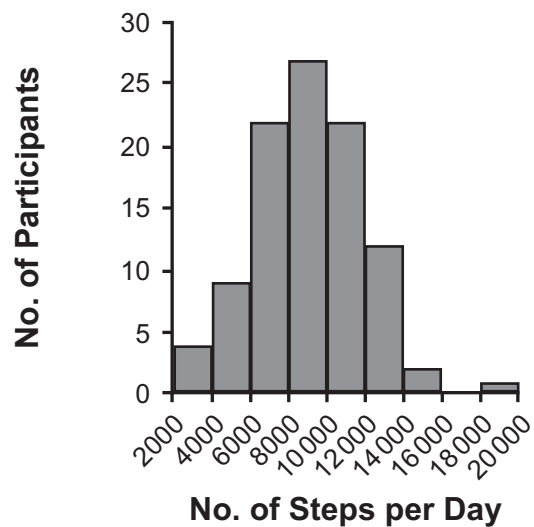

Supplement: attr-55-09-20_s01.pdf [file attr-55-09-20_s01.pdf]

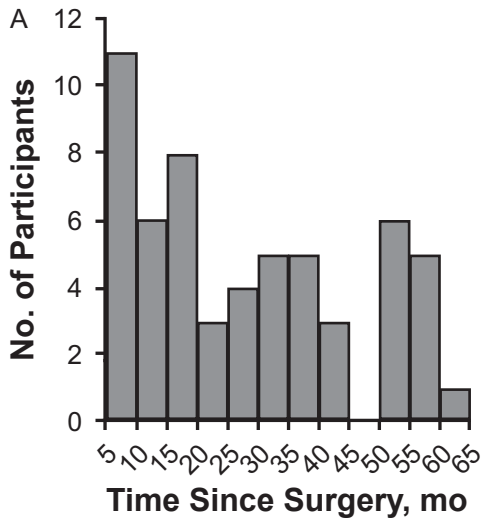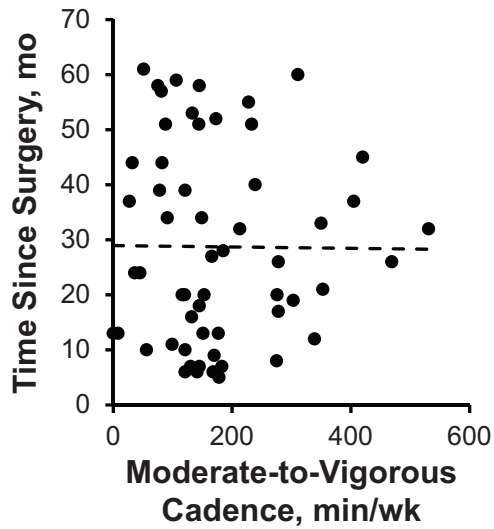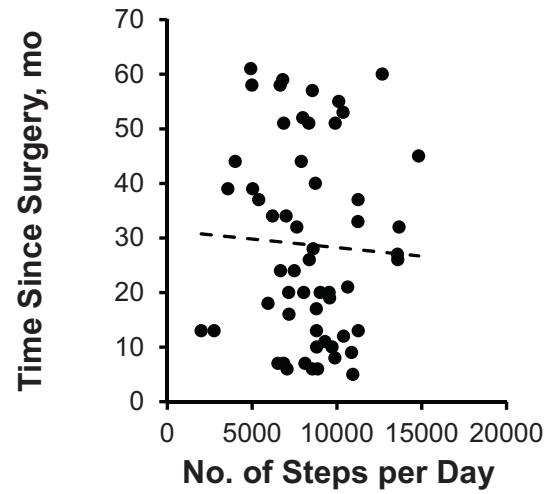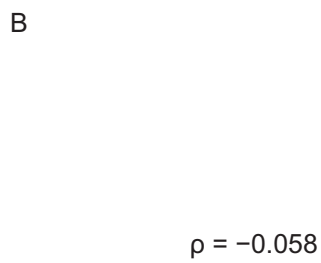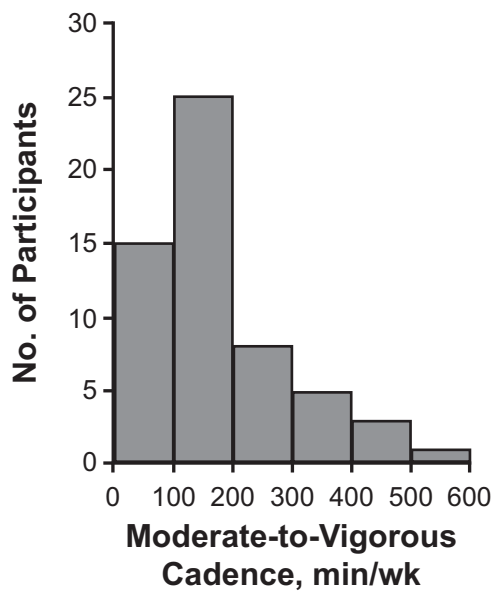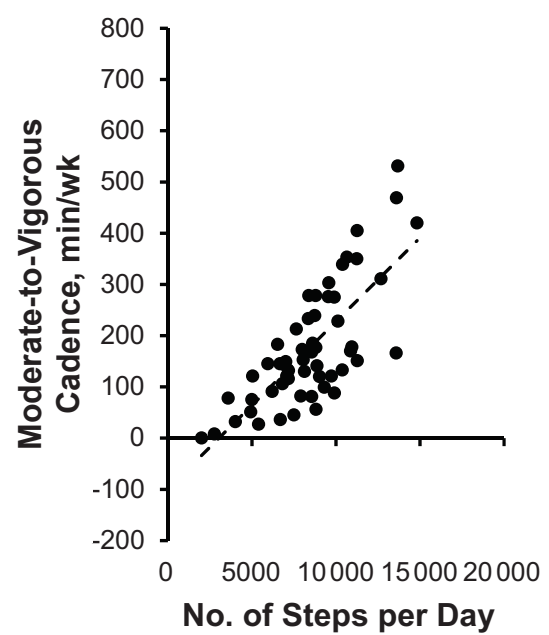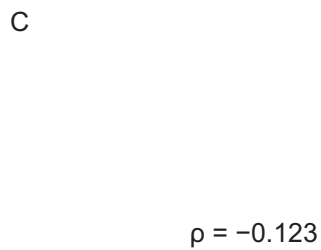

$\rho = 0.759$

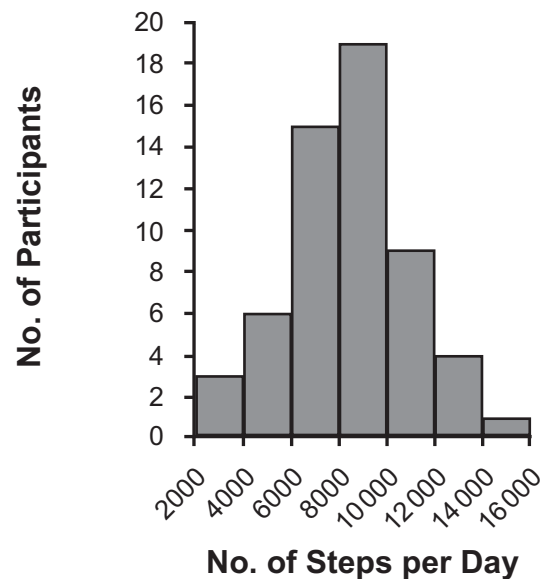

Supplement: attr-55-09-20_s02.pdf [file attr-55-09-20_s02.pdf]
